# Supplementary material
Source: MDPI journal article supplement (https://www.mdpi.com/2073-4395/12/7/1496)
Supplement: s1 [file s1]

Archive with 5 entries (5 files):
- Supplementary Figure S1.pdf
- Supplementary Table S1.pdf
- Supplementary Table S2 .pdf
- Supplementary Table S3 .pdf
- Supplementary Table S4 .pdf
